# Supplementary material for: Interaction of Pelargonium sidoides Compounds with Lactoferrin and SARS-CoV-2: Insights from Molecular Simulations
Source: MDPI journal article supplement (doi:10.3390/ijerph19095254), 2022-04-26
Supplement: s1 [file s1]

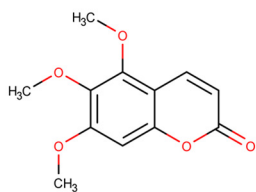

5,6,7-trimethoxycoumarin

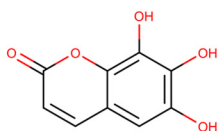

6,7,8-trihydroxycoumarin

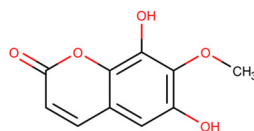

6,8-dihydroxy-7-methoxycoumarin

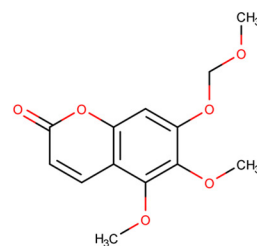

7-acetoxy-5,6-dimethoxycoumarin

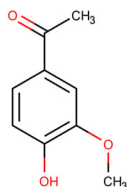

Apocynin

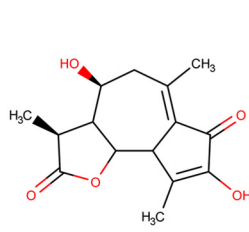

Artelin

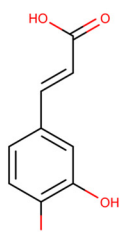

Caffeic acid

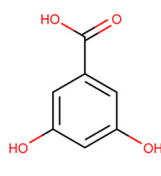

Dihydroxybenzoic acid

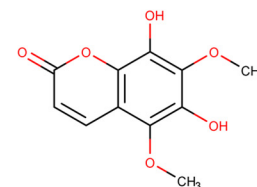

Dimethoxycoumarin

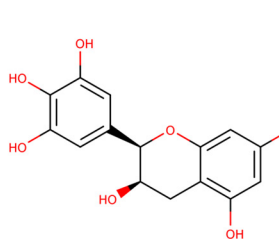

Epigallocatechin-3-gallate

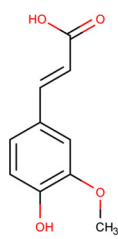

Ferulic acid

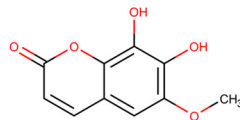

Fraxetin

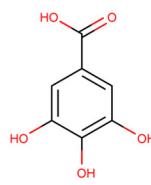

Gallic acid

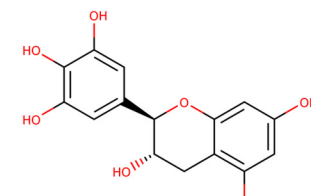

Galocatechin

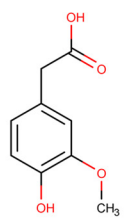

Homovanillic acid

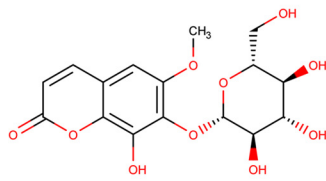

Isofraxoside

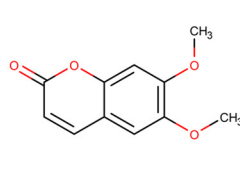

Isoorientin

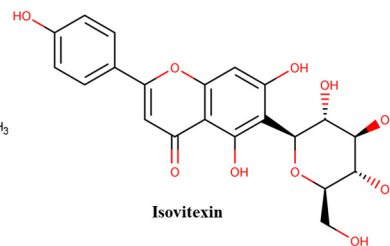

Isovitexin

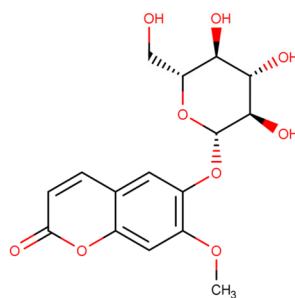

Magnoliolide

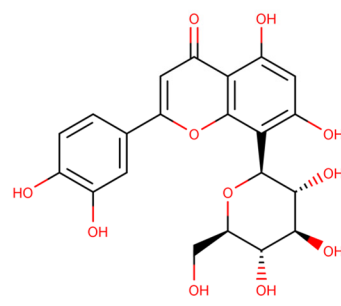

Orientin

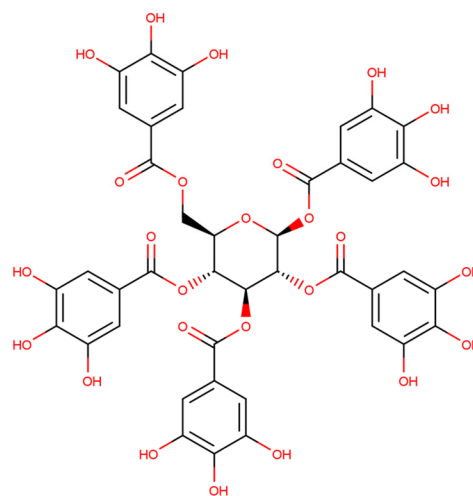

Pentagalloylglucose

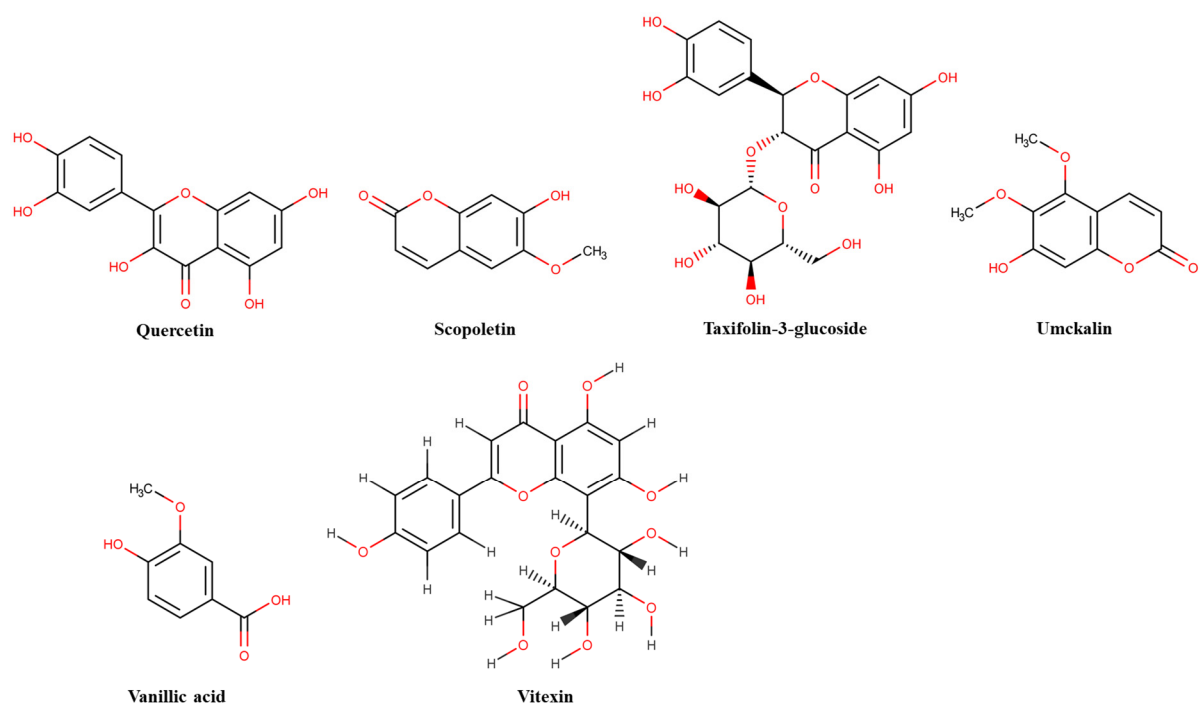

**Figure S1.** Schematic representation of chemical structure of the PEL compounds used for molecular docking and molecular dynamics simulations.





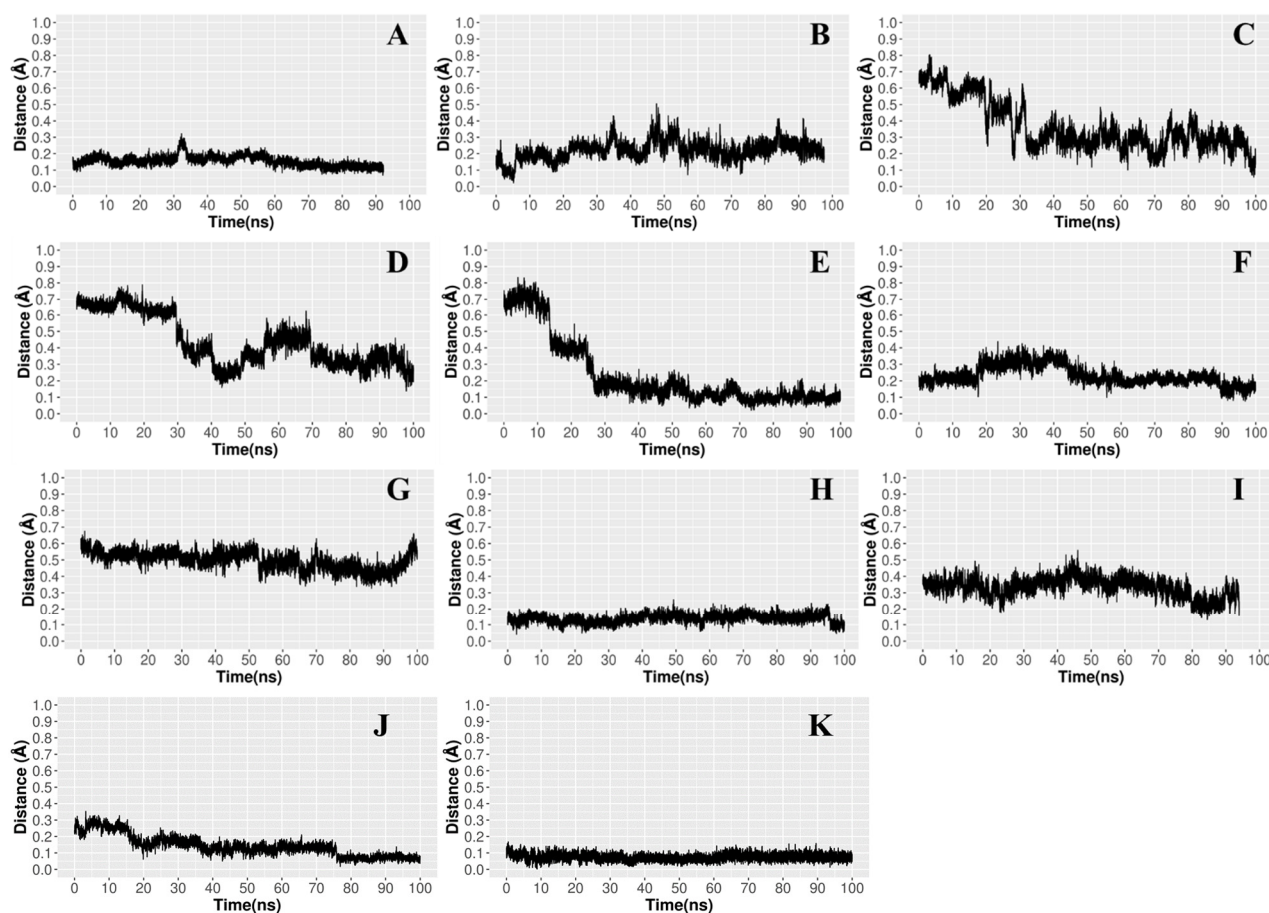

**Figure S3.** Distance as a function of simulation time calculated between the HR1 site of the spike glycoprotein and the compounds identified through docking. (A) Complex between spike glycoprotein and Pentagalloyl glucose. (B) Complex between spike glycoprotein and Vitexin. (C) Complex between spike glycoprotein and 6-8-dihydroxy-7-methoxycoumarin. (D) Complex between spike glycoprotein and Quercetin. (E) Complex between spike glycoprotein and Taxifolin-3-glucoside. (F) Complex between spike glycoprotein and Isofraxoside. (G) Complex between spike glycoprotein and Isovitexin. (H) Complex between spike glycoprotein and Gallocatechin. (I) Complex between spike glycoprotein and Isoorientina. (J) Complex between spike glycoprotein and Epigallocatechin. (K) Complex between the spike glycoprotein and the Magnolioside.

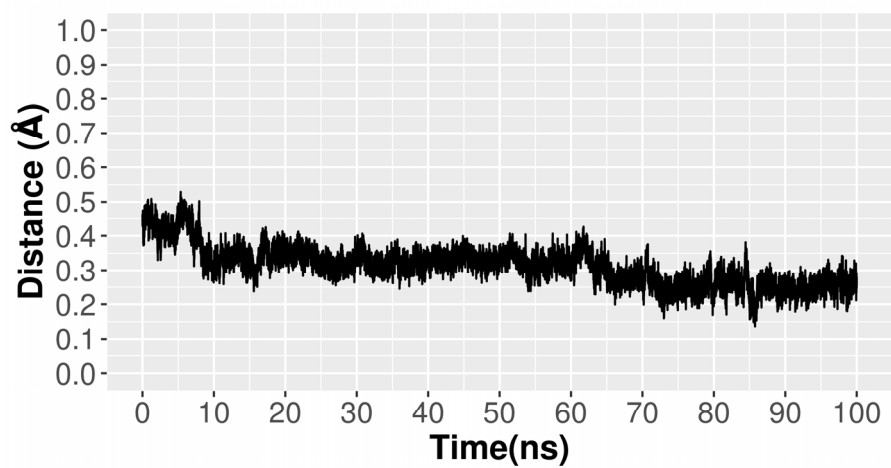

**Figure S4.** Distance as a function of simulation time calculated between the docking-identified site on the RdRp polymerase protein and the pentagalloyl glucose.

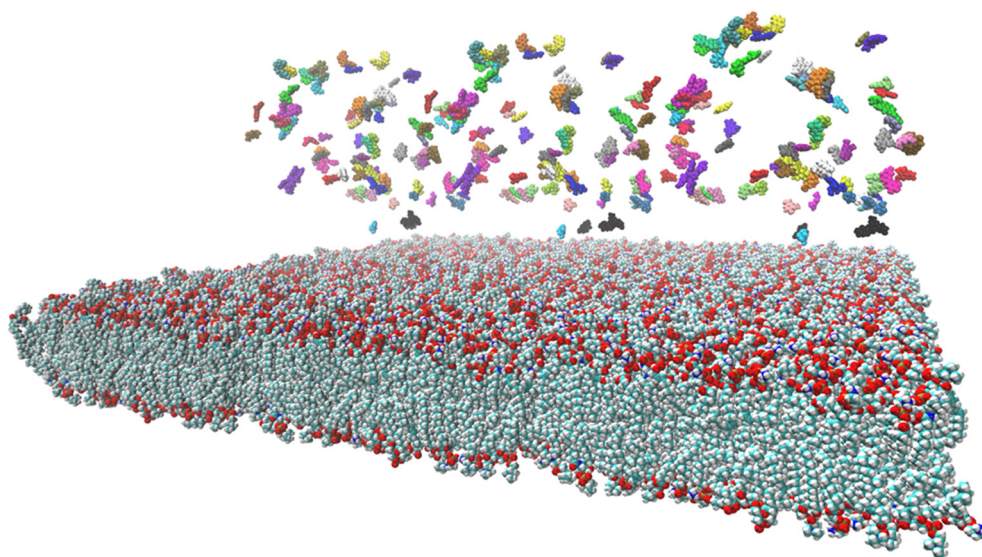

**Figure S5.** Molecular space-fill representation of the membrane-PEL compounds system. The different colors of the spheres highlight the 27 different compounds.

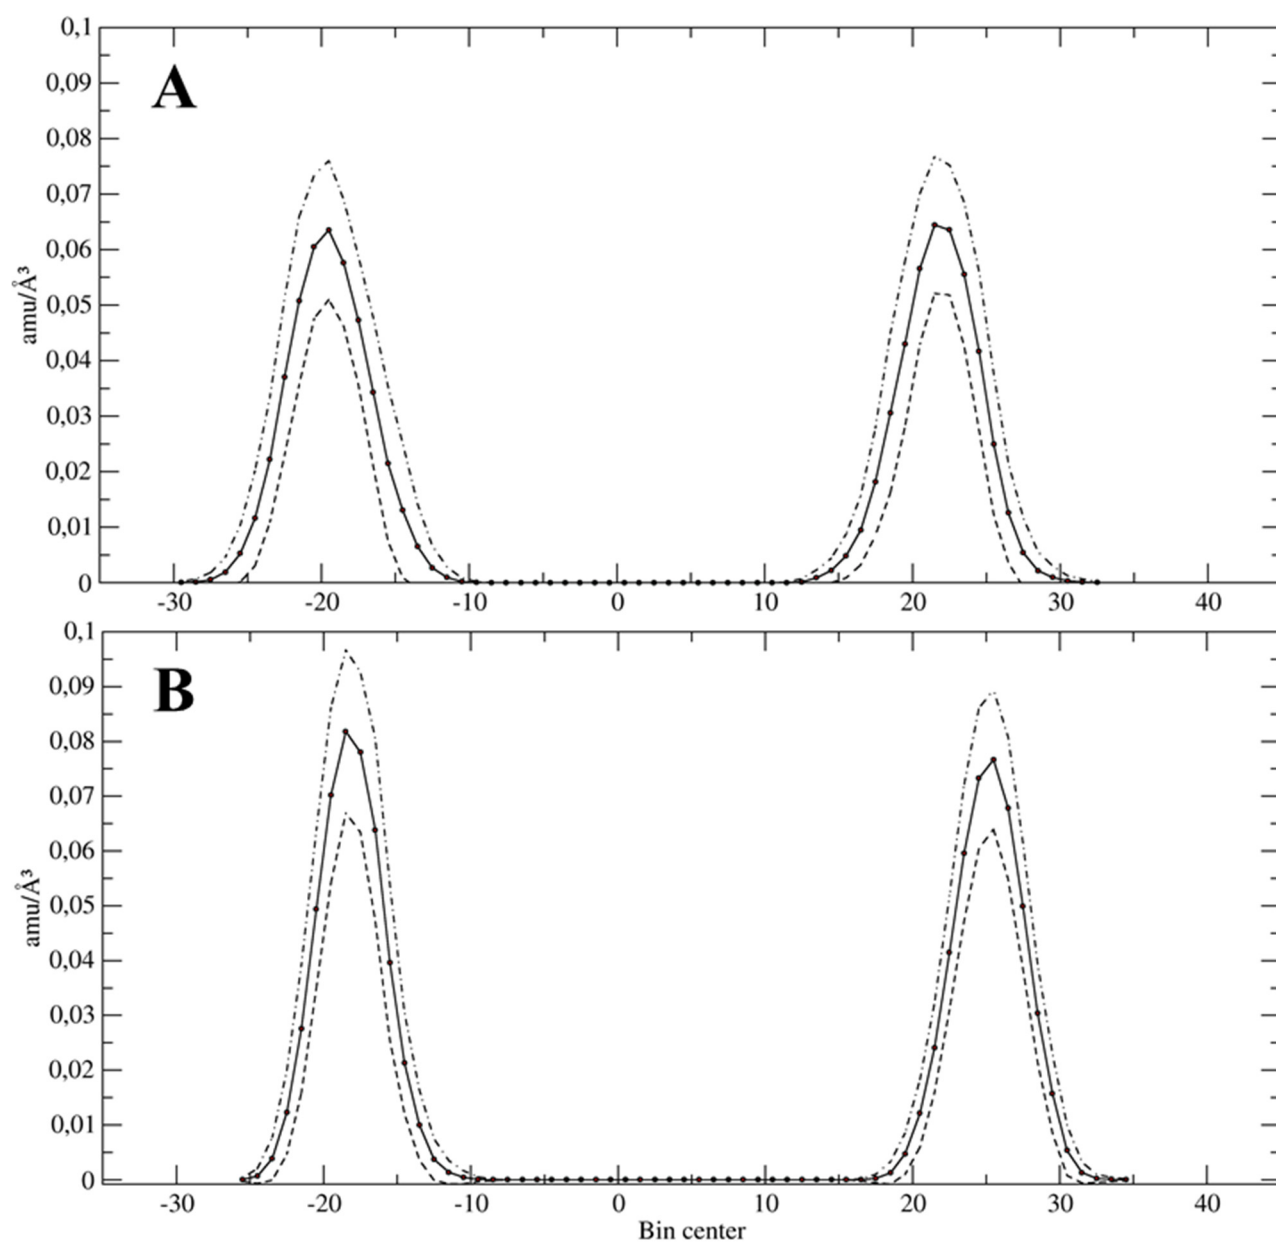

**Figure S6.** Density profiles of the two membrane layers as a function of the  $z$  axis for the system simulated in the absence (A) and presence (B) of the PEL compounds.

**Table S1.** Prediction of oral acute toxicity, class, and toxicity model of PEL compounds. Class I: death after swallowing ( $LD50 \leq 5$ ); Class II: death after swallowing ( $5 < LD50 \leq 50$ ); Class III: toxic after swallowing ( $50 < LD50 \leq 300$ ); Class IV: harmful after swallowing ( $300 < LD50 \leq 2000$ ); Class V: may be harmful after swallowing ( $2000 < LD50 \leq 5000$ ) and Class VI: non-toxic ( $LD50 > 5000$ ).

| Compound                        | ProTox-II Toxicity Class | ProTox-II LD50 (mg/kg) | ProTox-II Toxicity Model Report       |
|---------------------------------|--------------------------|------------------------|---------------------------------------|
| 6,7,8-trihydroxycoumarin        | IV                       | 2991                   | Putative immunotoxicity               |
| 5,6,7-trimethoxycoumarin        | V                        | 3800                   | Immunotoxicity (IL1RL1 inhibitor)     |
| 6,8-dihydroxy-7 methoxycoumarin | V                        | 3800                   | Putative immunotoxicity               |
| Apocynin                        | VI                       | 9000                   | -                                     |
| 7-acetoxy-5,6-dimethoxycoumarin | V                        | 3800                   | Putative immunotoxicity               |
| Artelin                         | V                        | 3800                   | -                                     |
| Dihydroxybenzoic acid           | IV                       | 1800                   | -                                     |
| Caffeic acid                    | V                        | 2980                   | Putative carcinogenicity              |
| Ferulic acid                    | IV                       | 1772                   | Putative immunotoxicity               |
| Epigallocatechin                | VI                       | 10000                  | -                                     |
| Dimethoxycoumarin               | V                        | 3800                   | -                                     |
| Gallic acid                     | IV                       | 2000                   | -                                     |
| Fraxetin                        | V                        | 3800                   | Putative immunotoxicity               |
| Isofraxoside                    | V                        | 5000                   | Putative immunotoxicity               |
| Homovanillic acid               | IV                       | 1123                   | -                                     |
| Gallocatechin                   | VI                       | 10000                  | -                                     |
| Magnolioside                    | V                        | 4000                   | -                                     |
| Isovitexin                      | III                      | 159                    | -                                     |
| Isoorientin                     | III                      | 159                    | -                                     |
| Pentagalloyl-glucose            | V                        | 2260                   | AhR activation                        |
| Taxifolin-3-glucoside           | V                        | 2300                   | -                                     |
| Scopoletin                      | V                        | 3800                   | -                                     |
| Quercetin                       | III                      | 159                    | Estrogen receptor $\alpha$ modulation |
| Vanillic acid                   | IV                       | 2000                   | -                                     |
| Umckalin                        | V                        | 3800                   | -                                     |
| Vitexin                         | IV                       | 832                    | -                                     |
